# Supplementary material
Source: PubMed Central journal article supplement (PMC5444134)
Supplement: AAC.00168-17_zac006176260s1.pdf [file AAC.00168-17_zac006176260s1.pdf]

**TABLE S1** Results of MICs obtained with the SYO method that differed by  $\pm 1$ ,  $\pm 2$ , and  $\pm 3$  dilutions from those obtained with the CLSI reference method for 86 *Aspergillus* species isolates

|                                      | No. of isolates for which MICs differ between the methods by the indicated number of dilution(s) |     |     |   |     |     |     | % of isolates for which MICs are in agreement within |                   |
|--------------------------------------|--------------------------------------------------------------------------------------------------|-----|-----|---|-----|-----|-----|------------------------------------------------------|-------------------|
|                                      | - 3                                                                                              | - 2 | - 1 | 0 | + 1 | + 2 | + 3 | $\pm 1$ dilution                                     | $\pm 2$ dilutions |
| <b>Posaconazole</b>                  |                                                                                                  |     |     |   |     |     |     |                                                      |                   |
| <i>A. fumigatus</i> (n = 21)         | 0                                                                                                | 0   | 6   | 8 | 6   | 1   | 0   | 95                                                   | 100               |
| <i>A. lentulus</i> (n = 3)           | 0                                                                                                | 0   | 1   | 1 | 0   | 1   | 0   | 67                                                   | 100               |
| <i>A. (Neosartorya) spp.</i> (n = 3) | 0                                                                                                | 0   | 0   | 2 | 0   | 0   | 1   | 67                                                   | 67                |
| <i>A. flavus</i> (n = 19)            | 0                                                                                                | 1   | 6   | 4 | 4   | 4   | 0   | 74                                                   | 100               |
| <i>A. oryzae</i> (n = 5)             | 0                                                                                                | 0   | 1   | 0 | 1   | 2   | 1   | 40                                                   | 80                |
| <i>A. terreus</i> (n = 12)           | 0                                                                                                | 6   | 2   | 1 | 2   | 1   | 0   | 42                                                   | 100               |
| <i>A. nidulans</i> (n = 5)           | 0                                                                                                | 0   | 0   | 1 | 3   | 1   | 0   | 80                                                   | 100               |
| <i>A. niger</i> (n = 7)              | 1                                                                                                | 1   | 1   | 3 | 1   | 0   | 0   | 71                                                   | 86                |
| <i>A. tubingensis</i> (n = 6)        | 0                                                                                                | 1   | 3   | 1 | 1   | 0   | 0   | 83                                                   | 100               |
| <i>A. foetidus</i> (n = 3)           | 0                                                                                                | 0   | 1   | 0 | 1   | 1   | 0   | 67                                                   | 100               |
| <i>A. awamori</i> (n = 2)            | 0                                                                                                | 0   | 1   | 0 | 1   | 0   | 0   | 100                                                  | 100               |
| <b>Voriconazole</b>                  |                                                                                                  |     |     |   |     |     |     |                                                      |                   |
| <i>A. fumigatus</i> (n = 21)         | 0                                                                                                | 0   | 5   | 3 | 10  | 3   | 0   | 86                                                   | 100               |
| <i>A. lentulus</i> (n = 3)           | 0                                                                                                | 0   | 0   | 0 | 2   | 1   | 0   | 67                                                   | 100               |
| <i>A. (Neosartorya) spp.</i> (n = 3) | 0                                                                                                | 0   | 0   | 2 | 1   | 0   | 0   | 100                                                  | 100               |
| <i>A. flavus</i> (n = 19)            | 0                                                                                                | 0   | 0   | 1 | 12  | 6   | 0   | 68                                                   | 100               |
| <i>A. oryzae</i> (n = 5)             | 0                                                                                                | 0   | 0   | 0 | 0   | 5   | 0   | 0                                                    | 100               |
| <i>A. terreus</i> (n = 12)           | 0                                                                                                | 0   | 0   | 1 | 10  | 1   | 0   | 92                                                   | 100               |
| <i>A. nidulans</i> (n = 5)           | 0                                                                                                | 0   | 0   | 1 | 4   | 0   | 0   | 100                                                  | 100               |
| <i>A. niger</i> (n = 7)              | 0                                                                                                | 0   | 0   | 4 | 2   | 1   | 0   | 86                                                   | 100               |
| <i>A. tubingensis</i> (n = 6)        | 0                                                                                                | 0   | 0   | 1 | 5   | 0   | 0   | 100                                                  | 100               |
| <i>A. foetidus</i> (n = 3)           | 0                                                                                                | 0   | 0   | 0 | 3   | 0   | 0   | 100                                                  | 100               |
| <i>A. awamori</i> (n = 2)            | 0                                                                                                | 0   | 0   | 1 | 1   | 0   | 0   | 100                                                  | 100               |
| <b>Itraconazole</b>                  |                                                                                                  |     |     |   |     |     |     |                                                      |                   |
| <i>A. fumigatus</i> (n = 21)         | 1                                                                                                | 4   | 10  | 6 | 0   | 0   | 0   | 76                                                   | 95                |
| <i>A. lentulus</i> (n = 3)           | 0                                                                                                | 2   | 1   | 0 | 0   | 0   | 0   | 33                                                   | 100               |
| <i>A. (Neosartorya) spp.</i> (n = 3) | 0                                                                                                | 0   | 3   | 0 | 0   | 0   | 0   | 100                                                  | 100               |
| <i>A. flavus</i> (n = 19)            | 1                                                                                                | 5   | 4   | 7 | 2   | 0   | 0   | 68                                                   | 95                |
| <i>A. oryzae</i> (n = 5)             | 0                                                                                                | 0   | 4   | 1 | 0   | 0   | 0   | 100                                                  | 100               |
| <i>A. terreus</i> (n = 12)           | 1                                                                                                | 2   | 6   | 3 | 0   | 0   | 0   | 75                                                   | 92                |

|                               |   |   |   |   |   |   |   |     |     |
|-------------------------------|---|---|---|---|---|---|---|-----|-----|
| <i>A. nidulans</i> (n = 5)    | 0 | 4 | 1 | 0 | 0 | 0 | 0 | 20  | 100 |
| <i>A. niger</i> (n = 7)       | 0 | 3 | 3 | 1 | 0 | 0 | 0 | 57  | 100 |
| <i>A. tubingensis</i> (n = 6) | 0 | 2 | 4 | 0 | 0 | 0 | 0 | 67  | 100 |
| <i>A. foetidus</i> (n = 3)    | 0 | 1 | 1 | 0 | 1 | 0 | 0 | 67  | 100 |
| <i>A. awamori</i> (n = 2)     | 0 | 0 | 2 | 0 | 0 | 0 | 0 | 100 | 100 |

---
